# Supplementary material
Source: Research Square preprint supplement (doi:10.21203/rs.3.rs-9534243/v1)
Supplement: Supplementary file 1 [file 0f9f27cbf5bc75ae4177e82e.docx]

**Annex 1: Care Checklist**

| Topic | Item | Checklist item description | Reported on Line |
| --- | --- | --- | --- |
| Title | 1 | The diagnosis or intervention of primary focus followed by the words “case report” | Pg 1 |
| Key Words | 2 | 2 to 5 key words that identify diagnoses or interventions in this case report, including 'case report' | Pg 3 |
| Abstract | 3a | Introduction: What is unique about this case and what does it add to the scientific literature? | Pg 2 |
| Abstract | 3b | Main symptoms and/or important clinical findings | Pg 2 |
| Abstract | 3c | The main diagnoses, therapeutic interventions, and outcomes | Pg 2 |
| Abstract | 3d | Conclusion—What is the main 'take-away' lesson(s) from this case? | Pg 2 |
| Introduction/background | 4 | One or two paragraphs summarizing why this case is unique (may include references) | Pg 3 - 4 |
| Patient Information | 5a | De-identified patient specific information | Pg 4 - 6 |
| Patient Information | 5b | Primary concerns and symptoms of the patient | Pg 4 - 6 |
| Patient Information | 5c | Medical, family, and psycho-social history including relevant genetic information | Pg 4 - 6 |
| Patient Information | 5d | Relevant past interventions with outcomes | Pg 4 - 6 |
| Clinical Findings | 6 | Describe significant physical examination (PE) and important clinical findings | Pg 4 - 6 |
| Timeline | 7 | Historical and current information from this episode of care organized as a timeline | Pg 4 - 6 |
| Diagnostic Assessment | 8a | Diagnostic testing (such as PE, laboratory testing, imaging, surveys) | Pg 4 - 6 |
| Diagnostic Assessment | 8b | Diagnostic challenges (such as access to testing, financial, or cultural) | Pg 4 - 6 |
| Diagnostic Assessment | 8c | Diagnosis (including other diagnoses considered) | Pg 4 - 6 |
| Diagnostic Assessment | 8d | Prognosis (such as staging in oncology) where applicable | Pg 4 - 6 |
| Therapeutic Intervention | 9a | Types of therapeutic intervention (such as pharmacologic, surgical, preventive, self-care) | Pg 4 - 6 |
| Therapeutic Intervention | 9b | Administration of therapeutic intervention (such as dosage, strength, duration) | Pg 4 - 6 |
| Therapeutic Intervention | 9c | Changes in therapeutic intervention (with rationale) | Pg 4 - 6 |
| Follow-up and Outcomes | 10a | Clinician and patient-assessed outcomes (if available) | Pg 4 - 6 |
| Follow-up and Outcomes | 10b | Important follow-up diagnostic and other test results | Pg 4 - 6 |
| Follow-up and Outcomes | 10c | Intervention adherence and tolerability (How was this assessed?) | Pg 4 - 6 |
| Follow-up and Outcomes | 10d | Adverse and unanticipated events | Pg 4 - 6 |
| Discussion | 11a | A scientific discussion of the strengths AND limitations associated with this case report | Pg 4 - 6 |
| Discussion | 11b | Discussion of the relevant medical literature with references | Pg 6 - 9 |
| Discussion | 11c | The scientific rationale for any conclusions (including assessment of possible causes) | Pg 6 - 9 |
| Discussion | 11d | The primary 'take-away' lessons of this case report (without references) in a one paragraph conclusion | Pg 6 - 9 |
| Patient Perspective | 12 | The patient should share their perspective in one to two paragraphs on the treatment(s) they received | Pg 6 - 9 |
| Informed Consent | 13 | Did the patient give informed consent? Please provide if requested | Pg 10 |
